1 Article

## 2 **Physiological and transcriptomic analysis of yellow** 3 **leaf coloration in *Populus deltoides* Marsh**

4 **Shuzhen Zhang**<sup>1</sup>, **Xiaolu Wu**<sup>1</sup>, **Jie Cui**<sup>1</sup>, **Fan Zhang**<sup>1,\*</sup>, **Xueqin Wan**<sup>2</sup>, **Qinglin Liu**<sup>1</sup>, **Yu Zhong**<sup>2</sup>  
5 **and Tiantian Lin**<sup>2</sup>

6 <sup>1</sup> College of Landscape Architecture, Sichuan Agricultural University, Chengdu 611130, China;  
7 limaoxiaojie@126.com (S.Z.); 778020343@qq.com (X.W.); 306946403@qq.com (J.C.); nolady@163.com (F.Z.);  
8 279682726@qq.com (Q.L.)

9 <sup>2</sup> College of Forestry, Sichuan Agricultural University, Chengdu 611130, China; w-xue@163.com (X.W.);  
10 867106174@qq.com (Y. Z.); 120470952@qq.com (T. L.)

11 \* Correspondence: nolady@163.com; Tel.: +86-151-9805-0108

12 Received: date; Accepted: date; Published: date

13 **Abstract:** As important deciduous tree, *Populus deltoides* Marsh possesses a high ornamental value  
14 for its leaves remaining yellow during the non-dormant period. However, little is known about the  
15 regulatory mechanism of leaf coloration in *Populus deltoides* Marsh. Thus, we analyzed  
16 physiological and transcriptional differences of yellow leaves (mutant) and green leaves (wild-type)  
17 of *Populus deltoides* Marsh. Physiological experiments showed that the contents of chlorophyll (Chl)  
18 and carotenoid are lower in mutant, the flavonoid content is not differed significantly between  
19 mutant and wild-type. Transcriptomic sequencing was further used to identify 153 differentially  
20 expressed genes (DEGs). Functional classifications based on Gene Ontology enrichment and  
21 Genomes enrichment analysis indicated that the DEGs were involved in Chl biosynthesis and  
22 flavonoid biosynthesis pathway. Among these, geranylgeranyl diphosphate (CHLP) genes  
23 associated with Chl biosynthesis showed down-regulation, while chlorophyllase (CLH) genes  
24 associated with Chl degradation were up-regulated in yellow leaves. The expression levels of these  
25 genes were further confirmed using quantitative real-time PCR (RT-qPCR). Furthermore, the  
26 measurement of the main precursors of Chl confirmed that CHLP is vital enzymes for the yellow  
27 leaf color phenotype. Consequently, the formation of yellow leaf color is due to disruption of Chl  
28 synthesis and catabolism rather than flavonoid content. These results contribute to our  
29 understanding of mechanisms and regulation of leaf color variation in poplar at the transcriptional  
30 level.

31 **Keywords:** poplar; transcriptome; RNA-Seq; flavonoids; chlorophylls; yellow-green leaf color  
32 mutant

33

---

### 34 1. Introduction

35 Leaf color is an important feature of ornamental plants, and trees with colored leaves have been  
36 widely cultivated in landscape gardens. The main factors that determine foliage color are the types  
37 of pigment and their relative concentrations. The formation of red leaves is the result of anthocyanin  
38 accumulation, which has been extensively studied [1]. In contrast, there are only a few studies focus  
39 on the mechanism of yellow leaves. Leaf yellowing is generally considered to be caused by  
40 decreased Chl content, since Chl is the main pigment content of green leaves [2]. Therefore, studies  
41 of leaf yellowing have mostly focused on Chl biosynthesis and degradation. In addition, leaf

42 yellowing may be also due to the accumulation of flavonoids such as flavanol, flavonol, chalcone,  
43 aurone [3,4].

44 The Chl biosynthetic pathway consists of about 20 different enzymatic steps, starting from  
45 glutamyl-tRNA to Chl a and Chl b [5]. Mutations in any one of the genes of the pathway can affect  
46 the accumulation of Chl [6], decrease photosynthesis capacity [7] and affect the development of  
47 chloroplast [8]. The silence of *CHLD* and *CHLI* (magnesium chelatase subunit D and I) induced by  
48 virus in peas resulted in yellow leaf phenotypes with rapid reduction of photosynthetic proteins,  
49 undeveloped thylakoid membranes, altered chloroplast nucleoid structure and malformed antenna  
50 complexes [9]. Moreover, in rice, *PGL10* encoded protochlorophyllide oxidoreductase B (PORB),  
51 pale-green leaf mutant *pgl10* had decreased Chl (a and b), carotenoid contents, as well as grana  
52 lamellae of chloroplasts compared with the wild-type [10]. In addition, mutants with disrupted Chl  
53 degradation were used to characterize many steps in the Chl degradation pathway in leaves  
54 undergoing senescence [11]. In *Arabidopsis* mutant deficient in PPH (pheophytinase), Chl  
55 degradation is inhibited, and the plants exhibit a typeC stay-green phenotype during senescence [12].  
56 Previous studies revealed that chlorophyllase (Chlase) is involved in Chl degradation in  
57 ethylene-treated citrus fruit and could regulate the balance between different plant defense  
58 pathways, enhance plant resistance to bacteria [13-15]. Recently, Mutants deficient in Chl  
59 biosynthesis and degradation have been identified in many yellow leaf plants, such as rice [16-19],  
60 *Arabidopsis thaliana* [20] and pak-choi [21].

61 The genotype we reported is a kind of *Populus deltoides* Marsh (mutant), which is a bud  
62 mutation of green leaf *Populus deltoides* Marsh (wild-type) (Figure 1). The mutant is a rare yellow leaf  
63 variety which was found in poplar plants of the Salicaceae family. There exists extremely high  
64 ornamental value for this species because its leaves remain golden in spring, summer and autumn.  
65 However, the molecular mechanism underlying the leaf color of the mutant has not yet been  
66 elucidated. Many ornamental plant cultivars with fruit or flower color variation arose from the bud  
67 mutation. For instance, the color in grape skin changes from white to red due to bud mutant [22],  
68 flower color mutants of roses, carnations and chrysanthemums have also been reported [23]. In  
69 contrast, yellow leaf phenotype caused by bud mutant were hardly reported. On the other hand, the  
70 study related to yellow leaf color were mostly focused on leaf yellowing. For example, the tea  
71 cultivar 'Anji Baicha' produces yellow or white shoots at low temperatures, and turn green when the  
72 environmental temperatures increase [24]. Only a few studies have reported the yellow leaf  
73 phenotype, such as the cucumber Chl-deficient golden leaf mutation [25].

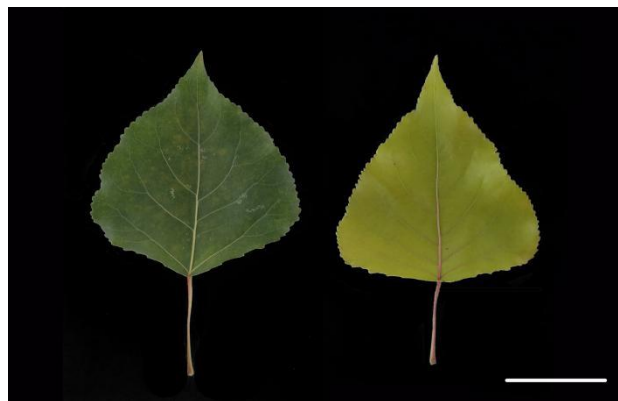

74

75 **Figure 1.** Phenotype of green leaf and yellow leaf. Bar=5 cm.

76 In this study, the photosynthetic pigments contents, Chl precursors contents, flavonoid contents  
77 and transcriptomics of the mutant type and wild type were analyzed. Based on a combination of  
78 biochemical analysis and bioinformatics, we identified differentially expressed genes (DEGs related  
79 to Chl and flavonoid biosynthesis. Furthermore, the expression of DEGs involved in leaf coloration

80 was validated using quantitative real-time polymerase chain reaction (RT-qPCR). Our results  
81 clarified the physiological and transcriptomic aspects of golden leaf coloration in *Populus deltoides*  
82 Marsh and will serve as a platform to advance the understanding of the regulatory mechanisms  
83 underlying the leaf color formation in poplar and other plant species.

## 84 2. Results

### 85 2.1. Pigment content analysis of wild-type and mutant

86 We analyzed changes in the pigment contents of wild-type leaves and mutant leaves. The  
87 uroporphyrinogen III (Urogen III) content of the yellow leaves was significantly higher than that of  
88 the wild-type, whereas there were no significant differences in coproporphyrinogen III (Coprogen  
89 III) (Figure 2). Further detailed analysis showed that the protoporphyrin IX (Proto IX), magnesium  
90 protoporphyrin IX (Mg-Proto IX) and protochlorophyllide (Pchlde) contents of the mutant were  
91 significantly decreased by about 52.53%-64.71% than those from green leaves. On the other hand, the  
92 content of chlorophyllide (Chlide) a in yellow leaves was lower than that of green leaves. Compared  
93 with the green leaves, the Chl a content, Chl b content and carotenoids content of yellow leaves  
94 decreased significantly by 72.41%, 84.86% and 53.88%, respectively (Figure 2). In addition, the  
95 difference between the total flavonoid contents of the green leaves and yellow leaves was not  
96 significant (Figure 2).

A

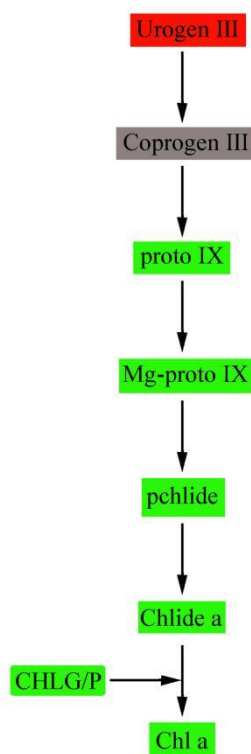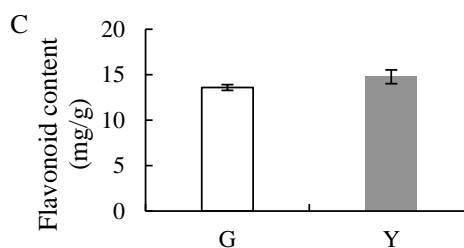

97

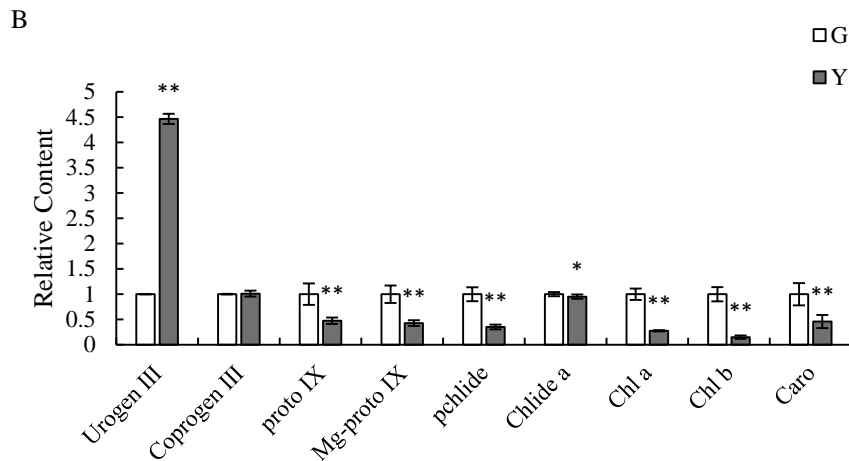

98

99

100

101

102

103

104

105

106

107

108

**Figure 2.** Determination of pigment contents in G (green leaves) and Y (yellow leaves). (A) Schematic view of the Chl biosynthesis pathway. The rounded rectangle shows the gene encoding protein catalyzing the reaction of the precursors. The red color means significantly increased in the Y leaves. The green color means significantly decreased or down-regulated in the Y leaves. The gray color means there was no significant difference between the G and Y leaves; (B) Comparison of the relative contents of Chl precursors and photosynthetic pigments; (C) Comparison of the flavonoid contents. Asterisks indicate: (\*)  $P \leq 0.05$ , (\*\*)  $P \leq 0.01$ . Urogen III, uroporphyrinogen III; Coprogen III, coproporphyrinogen III; Proto IX, protoporphyrin IX; Mg-Proto IX, Mg-protoporphyrin IX; Pchlide, protochlorophyllide; Chlide a, chlorophyllide a; Chl a, chlorophyll a; Chl b, chlorophyll b; Caro, carotenoid.

109

## 2.2. Analysis of sequencing data

110

111

112

113

114

115

116

117

RNA-seq libraries were constructed from green and yellow leaf samples and sequenced using the Illumina HiSeq™ 4000 platform for acquiring a comprehensive overview of leaf coloration. Approximately 45 million and 47 million raw reads were obtained from each sample. After removal of adaptor sequence and low quality reads, the number of clean reads in the two libraries was 40,779,290 and 41,776,346. The Q20 and Q30 of the two samples were at least 97.28 and 93.20%, respectively, and the GC contents both exceeded 45%. Additionally, 73.79% or 71.67% of reads of each samples were mapped to the *Populus trichocarpa* Torr. & Gray genome sequence and approximately 47% of the mapped reads were uniquely mapped reads (Table 1).

118

**Table 1.** Summary of the sequencing and mapping results.

| Sample name   | G                | Y                |
|---------------|------------------|------------------|
| Raw reads     | 45846322         | 47483602         |
| Clean reads   | 40779290         | 41776346         |
| Q20(%)        | 97.45            | 97.28            |
| Q30(%)        | 93.57            | 93.20            |
| GC content(%) | 45.36            | 45.14            |
| Total mapped  | 30092762(73.79%) | 29942722(71.67%) |

Uniquely mapped                      9961342(48.85%)                      9903152(47.41%)

---

119    2.3. Analysis of gene expression

120        In total, the number of expressed genes were 28,657 and 28,124 in green (G) and yellow (Y)  
121 leaves, respectively, of which 1760 and 1227 genes were expressed specifically in the G and Y type  
122 (Figure 3). In order to identify DEGs between G and Y, we set the expression of genes in G as the  
123 control and identified genes that were up- or downregulated in Y. Accordingly, A total of 153 DEGs  
124 were found in Y, including 52 up-regulated genes and 101 down-regulated genes.

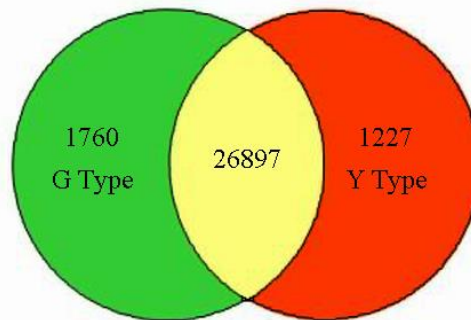

125

126        **Figure 3.** The numbers of specific genes and shared genes between G and Y.

127    2.4. Gene functional annotation by GO, and KEGG

128        GO assignments were used to classify the functions of DEGs. A total of 12, 9, and 5 of the DEGs  
129 were divided into biological processes, cellular components and molecular functions respectively,  
130 and some DEGs were annotated with more than one GO term (Figure 4). In the biological process  
131 category, a large number of DEGs fell into the categories of 'cellular process', 'metabolic process',  
132 and 'single-organism process' (Table S1). The most enriched terms of the cellular component were  
133 involved in 'cell', 'cell part', and 'membrane', 'membrane part' were also significantly enriched  
134 terms (Table S1). Meanwhile, the dominant categories with respect to molecular function group  
135 were 'binding' and 'catalytic activity' (Table S1).

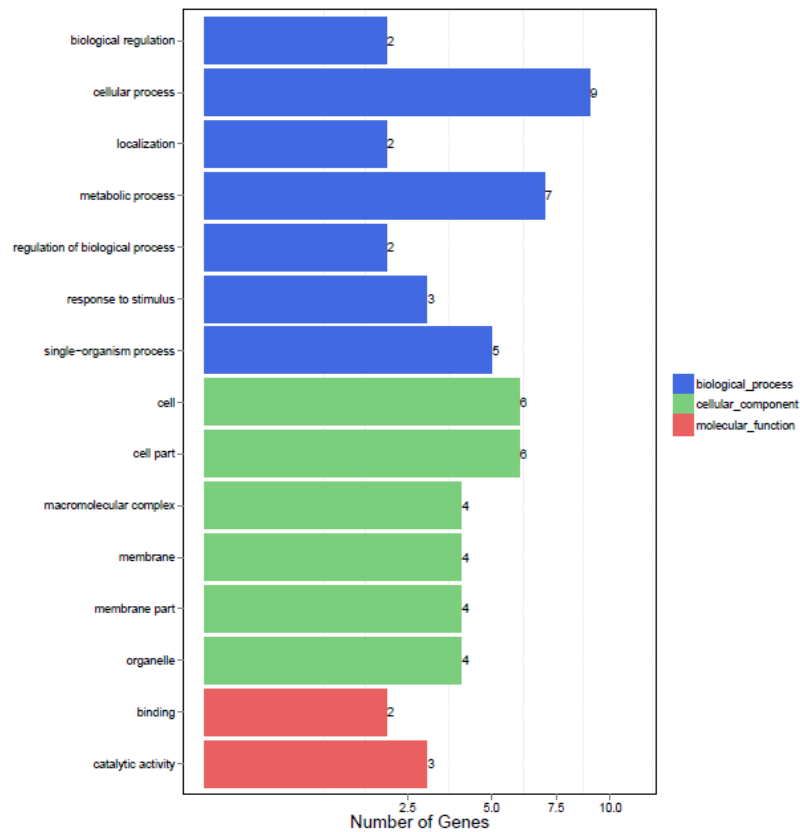

136

137 **Figure 4.** The most enriched GO term assignment to DEGs in G and Y. X-axis displays the gene  
138 number. The DEGs were annotated in three categories: biological process, cellular component and  
139 molecular function (Y-axis).

140 KEGG pathway analysis was performed to categorize gene functions with an emphasis on  
141 biochemical pathways that were active in G and Y. A total of 52 genes were annotated and assigned  
142 to 31 KEGG pathways (Table S2). The most significantly enriched pathway was 'Metabolic pathways'  
143 (Figure 5), with 15 associated DEGs (ranked by padj value), followed by 'Biosynthesis of secondary  
144 metabolites' and 'Ribosome' with 8 and 5 DEGs, respectively, which supported the results of GO  
145 assignments that 'metabolic process' was significantly enriched. Moreover, 3 DEGs were assigned to  
146 'Porphyrin and Chl metabolism' and 2 DEGs were assigned to 'Flavonoid biosynthesis'. This cluster  
147 of results indicated that the differences in metabolic activities were the main difference between G  
148 and Y, and they may perform important roles in the regulating of leaf coloration.

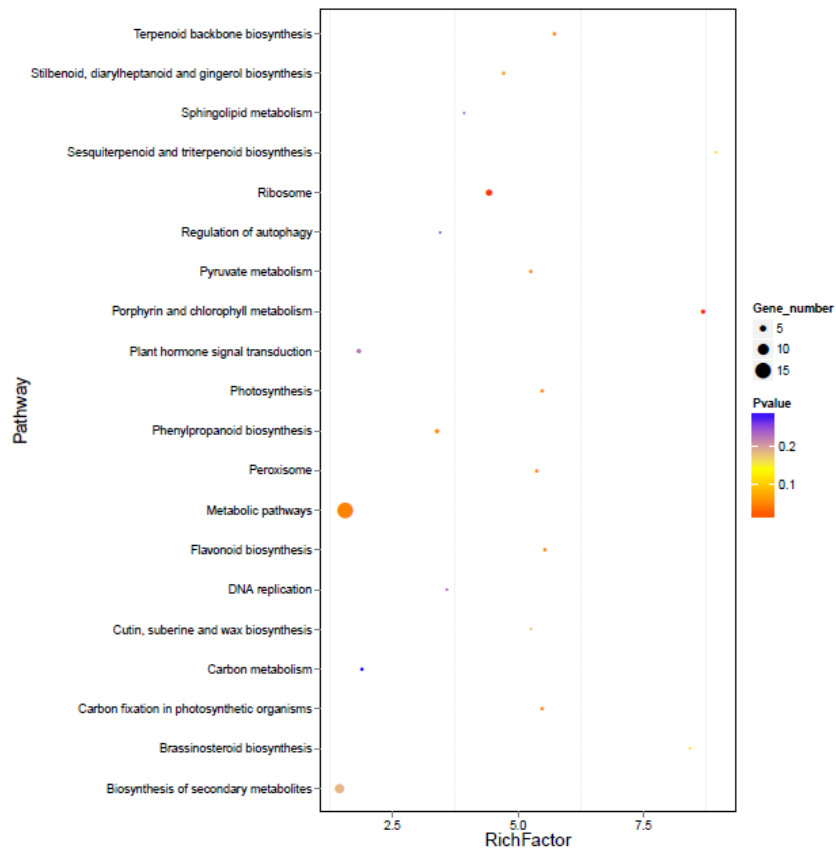

149

150 **Figure 5.** The enriched KEGG pathways of DEGs. The X-axis displays the Rich factor, and the Y-axis  
 151 displays the KEGG pathways. The size of the dot corresponds to the number of DEGs in the pathway,  
 152 and the colour of the dot indicates different Q value.

153 *2.5. Analysis on Genes Related to Chl and Flavonoid Biosynthesis*

154 Based on the above annotations, we found that the *Populus deltoides* Marsh transcriptome  
 155 database contains genes involving in Chl biosynthesis and flavonoid biosynthesis (Table 2). Two  
 156 genes annotated as CHLP (Potri.019G009000 and Potri.019G024600) were down-regulated in Y. In  
 157 the last step of Chl a biosynthesis, the geranylgeranyl diphosphate (CHLP, EC:1.3.1.111) catalyzes  
 158 the reduction of geranylgeranyl pyrophosphate to phytol pyrophosphate and yields Chl (Figure 6).  
 159 Furthermore, the gene encoding Chlase (CLH, EC:3.1.1.14) plays roles in the transition of Chl a(b) to  
 160 Chlide a(b), which was found to be up-regulated in Y. In flavonoid biosynthesis, two genes  
 161 annotated as HCT were differentially expressed in G and Y. Of these, one gene (Potri.006G034100)  
 162 was more highly expressed in G while the other gene (Potri.005G028500) was more highly expressed  
 163 in Y.

164 **Table 2.** DEGs involved in Chl and flavonoid biosynthesis in mutant transcriptome.

| Function                 | Gene ID          | Seq. Description                                   | log2FC   |
|--------------------------|------------------|----------------------------------------------------|----------|
| chlorophyll biosynthesis | Potri.019G009000 | GDSL-like Lipase/Acylhydrolase superfamily protein | -10.7764 |
|                          | Potri.019G024600 | GDSL-like Lipase/Acylhydrolase superfamily protein | -10.1319 |
|                          | Potri.005G214100 | chlorophyllase 1                                   | 9.6073   |



|                        |                  |                                            |         |
|------------------------|------------------|--------------------------------------------|---------|
| flavonoid biosynthesis | Potri.005G028500 | HXXXD-type acyl-transferase family protein | 9.2808  |
|                        | Potri.006G034100 | HXXXD-type acyl-transferase family protein | -9.8978 |

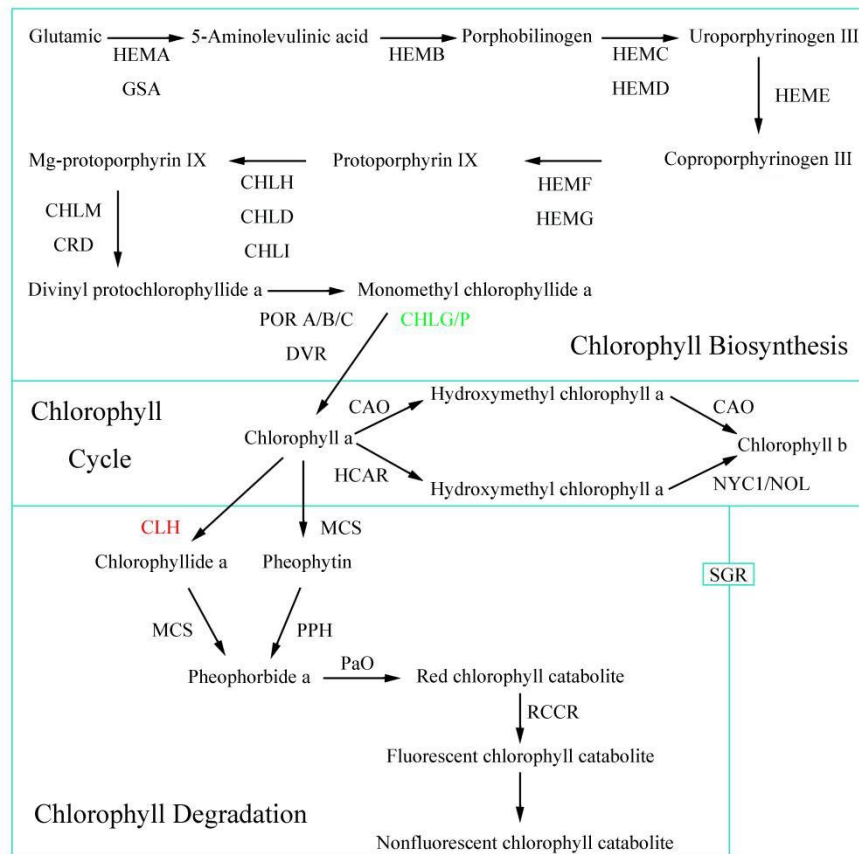

165

166

167

**Figure 6.** DEGs at the transcript level involved in Chl biosynthesis pathways. Up-regulated genes are marked by red and down-regulated genes by green.

168

### 2.6. Quantitative real-time PCR validation of RNA Sequencing data

169

170

171

172

173

To validate the accuracy of RNA-seq expression results, 8 DEGs with marked changes in plant hormone signal transduction, flavonoid biosynthesis and Chl biosynthesis were detected by qPCR (Figure 7). The results showed that except 3 genes (DELLA, HCT, CLH), the remaining 5 genes were all down-regulated in mutant plants. In general, qRT-PCR results concur with the RNA-seq data, indicating that the DEGs identified by RNA-seq were accurate.



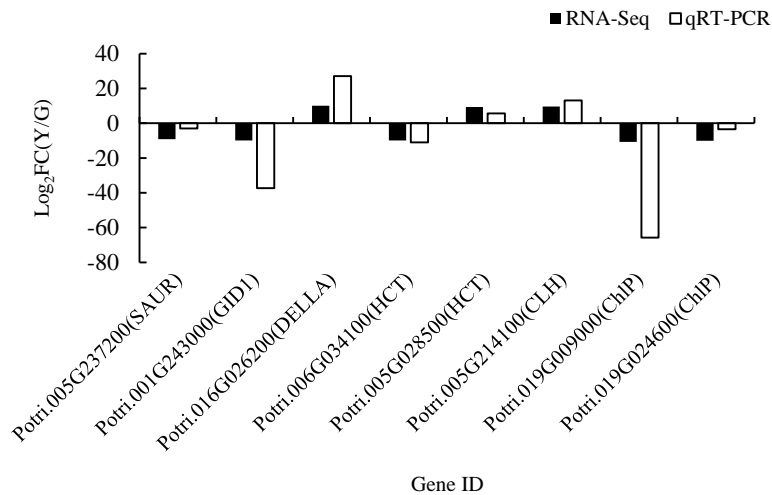

174

175 **Figure 7.** RT-qPCR analysis of the expression values of the 8 DEGs in the Y type. Log<sub>2</sub>(FC) represents  
176 the fold change in Y relative to that in G.

### 177 3. Discussion

178 The expression of leaf color in the mutants is often influenced by genes involved in the  
179 chloroplast development, Chl synthesis and catabolism, or environmental conditions like  
180 temperature and light intensity. Of the many rice yellow green leaf mutants, *ygl1* mutant is due to a  
181 missense mutation in a highly conserved residue of *YGL1* which encodes the Chl synthase (CHLG)  
182 [7], *ygl2* mutant is due to an insert mutation of *YELLOW-GREEN LEAF2* which encodes Heme  
183 Oxygenase 1 [26]. The impaired chloroplast development of pak-choi yellow leaf mutant is  
184 associated with blocked Chl biosynthesis process [21]. In *Setaria italica*, the chlorotic organs is caused  
185 by *EGY1* (ethylene-dependent gravitropism-deficient and yellow-green 1), which results in  
186 premature senescence and damaged PS II function [27]. The single incompletely dominant gene  
187 *Y1718* that is on chromosome 2BS is responsible for the yellow leaf color phenotype of wheat mutant  
188 [28]. As a result of a single nucleotide substitution in the *CsChlI* gene for magnesium chelatase I  
189 subunit, the cucumber mutant exhibited the golden yellow leaf color throughout its growth stage  
190 [25]. The leaf color in the *Japonica* rice is temperature dependent, the mutant displayed yellow-green  
191 leaves at low temperature (20°C) and green leaves at higher temperature (34°C) during the seedling  
192 stage [29]. The golden leaves of tropical plant *Ficus microcarpa* L. f. cv. is high-light sensitive, which  
193 sun-leaves are yellow and shade-leaves are green [30]. In this study, yellow leaf color of G-type is  
194 caused by genes involved in the Chl synthesis and catabolism.

#### 195 3.1. The Expression Level of Genes Involved in Chl Biosynthesis Were Altered in Leaf Color Mutants

196 Leaf color formation is closely related to Chl biosynthesis and breakdown, most leaf color  
197 mutations are Chl-deficiency mutations [31]. Chl is responsible for harvesting solar energy and  
198 electron transport, even turning plants green because it is Mg<sup>2+</sup>-containing tetrapyrrole pigments  
199 [32]. In this study, the novel Chl-deficient chlorina mutant of *Populus deltoides* Marsh with yellow leaf  
200 phenotype was identified. Compared with G, the content of photosynthetic pigments in the Y were  
201 significantly lower. In particular, the Chl b content were six times higher in Y than G plants. Those  
202 results suggesting that the yellow leaf phenotype in mutant is a result of a lack of Chls.

203 The Chl metabolic process can be subdivided into three parts: biosynthesis of Chl a, the Chl  
204 cycle between Chl a and b, and degradation of Chl a [33-35]. Chl is composed of two moieties, Chlide  
205 and phytol, which are respectively formed from the precursor molecules 5-aminolevulinic acid and  
206 isopentenyl diphosphate [36]. *CHLP* encodes the enzyme geranylgeranyl reductase catalysing  
207 terminal hydrogenation of geranylgeraniol to phytol for Chl synthesis [37,38]. Previous studies

208 revealed that in transgenic tobacco (*Nicotiana tabacum*) expressing antisense *CHLP* RNA,  
209 transformants with gradually reduced *CHLP* expression displayed a uniform low pigmentation and  
210 a pale or variegated phenotype [39]. In cyanobacterium *Synechocystis* sp. PCC 6803,  $\Delta chlP$  mutant  
211 exhibit decreased Chl and total carotenoids contents, and unstable photosystems I and II [40]. Two  
212 *CHLP* genes (Potri.019G009000 and Potri.019G024600) were identified in our database, and both  
213 were down-regulated in the mutant. In the meantime, qPCR experiment further verified that  
214 expression levels of *CHLP* genes in Y were highly reduced compared with those in G, which  
215 suggesting that a later stage of Chl biosynthesis was interrupted. Parallel experiments also showed  
216 that the content of Chlide a was about 4.83% lower, while the content of Chl a was 72.41% lower in  
217 the Y compared to G. The result suggests that the inhibition of enzyme activity of CHLP protein is  
218 likely to further suppress the biosynthesis of Chl in G. In addition, Our physiological results show  
219 that the content of Urogen III in the G is about 4 times than that of the Y, but the content of Coprogen  
220 III is no significantly differed between G and Y. Therefore, there might be an interruption between  
221 Urogen III and Coprogen III during Chl biosynthesis. However, the results need further verification.

222 Four enzymatic steps of the Chl catabolic pathway are that phytol, magnesium, and the  
223 primary cleavage product of the porphyrin ring are catalyzed by Chlase, Mg-dechelatase,  
224 pheophorbide a oxygenase, and red Chl catabolite reductase [41]. Chlase catalyzes the hydrolysis  
225 ester bond of Chl to yield Chlide and phytol, is thought to be the first enzyme in the Chl degradation  
226 [42]. Chlase activity is negatively correlated with Chl levels during citrus fruit color break and  
227 Chlase participate in Chl breakdown of citrus [15]. However, some evidence does not support that  
228 Chlase play a critical role in Chl degradation during leaf senescence [43-45]. For example,  
229 overexpression of *ATHCOR1* which has Chlase activity in *Arabidopsis* led to an increased  
230 breakdown of Chl a, but the total Chl level was not increased [43]. Similarly, *Arabidopsis* Chlases  
231 (*AtCLH1* and *AtCLH2*) is not positively regulated with leaf senescence, *CHL1* and *CHL2* single and  
232 double knockout mutant plants do not display a significant delay in senescence [44]. Schelbert et al.  
233 also support the opinions that Chlase was not to be essential for dephytylation after Chl is converted  
234 into pheophorbide [12]. In our study, the transcript expression patterns suggested that the  
235 expression of *CLH* was higher in the Y than in the G. Moreover, previous studies in common wheat  
236 (*Triticum aestivum* L.) showed that the gene encoding Chlase in the Chl biosynthesis pathway was  
237 also significantly up-regulated in the yellow leaf mutant [45]. Therefore, experiments related to  
238 cloning and functional verification of *CLH* in *Populus deltoides* Marsh are need to further verify the  
239 function of Chlase in Chl breakdown.

### 240 3.2. The Expression Level of Genes Involved in Flavonoid Biosynthesis Were Altered in Leaf Color Mutants

241 Flavonoids, carotenoids, and Chls are the main pigments responsible for flower and leaf color.  
242 Previous studies have demonstrated that flavonoids are the main pigments, producing purple, blue,  
243 yellow, and red colors in plants [46]. Flavonoids have been known as UV-protecting pigments and  
244 antioxidants by scavenging molecular species of active oxygen [47,48]. In *Ficus microcarpa* L. f., the  
245 golden leaf mutant is the result of continuous high-light irradiation, and the flavonoid level of  
246 golden leaf was 5-fold higher than that of green leaf, the results suggest that the increase of  
247 flavonoids in the golden leaf may protect the leaves from high-light stress [49]. In this study, there is  
248 no significant differences in the content of flavonoid between Y and G. Therefore, we consider  
249 yellow leaf phenotype is caused by genetic factors, not environmental factors. Shikimate/quinic  
250 hydroxycinnamoyltransferase (E2.3.1.133, HCT) belongs to the large family of BAHD-like  
251 acyltransferases [50]. It is a key enzyme that determines whether 4-coumaroyl CoA is the direct  
252 precursor for flavonoid or H-lignin biosynthesis [51]. In *Arabidopsis*, silencing of the *HCT* gene  
253 resulted in severely reduced growth and absent S lignin [52]. The down-regulation of *HCT* have a  
254 dramatic effect on lignin content and composition in alfalfa and poplar [53,54]. Up to now, Most  
255 studies focus on the effects of *HCT* on lignin synthesis [55,56], while only a few studies related to the  
256 *HCT* in flower color or leaf color of plants. It is further proved that the blocked Chl synthesis  
257 pathway in Y may be the consequence of yellowing of the leaves.

## 258 4. Materials and Methods

259 4.1. *Plant materials and growing conditions*

260 The green leaf populus cultivar (wild-type) and the yellow leaf populus cultivar (mutant) were  
261 used in this study. The plants were three-years-old and grown in Hongxia Nursery, Mianzhu Town,  
262 Sichuan Province, China. Leaf tissues were collected in May, sampling three leaves per plant for five  
263 plants of each type. All of the leaves were frozen immediately in liquid nitrogen after collection and  
264 stored at  $-80^{\circ}\text{C}$  for subsequent experiments.

265 4.2. *Measurements of Photosynthetic Pigments, Chl Precursors and flavonoid contents*

266 Approximately 0.1 g leaves of the G and Y were selected for Chl and carotenoid measurements.  
267 The pigment (Chl a, Chl b, and carotenoid) contents were measured using the method described by  
268 Lichtenthaler [57]. Coprogen III was extracted and determined as described by Bogorad [58]. To  
269 measure the contents of Proto IX, Mg-Proto IX, Pchlide and Chlide a, leaves were ground into  
270 powders with liquid nitrogen and submerged in nine volumes of phosphate-buffered saline (pH 7.4)  
271 in an ice bath, then centrifuged (30 min at 8000 rpm). The supernatant was determined using ELISA  
272 kit (MEIMIAN, Jiangsu, China) with a Thermo Scientific Multiskan FC (Thermo Fisher Scientific,  
273 MA, USA). Flavonoid contents were measured using a UV1901 PCS Double beam UV-VIS  
274 Spectrophotometer (Shanghai Yoke Instrument Co., Ltd., Shanghai, China) according to the  
275 instructions of Favonoid Plant kit (Suzhou Comin Biotechnology Co., Ltd., Jiangsu, China). Three  
276 biological replicates were evaluated for each sample. The data were analyzed using version 17.0 of  
277 SPSS software (SPSS Inc., Chicago, IL, USA) with t test, and means were compared at the  
278 significance levels of 0.01 and 0.05. The relative values of photosynthetic pigments and Chl  
279 precursors in the Y use the value of G as control and calculated as 1.

280 4.3. *RNA extraction, quantification and qualification*

281 Total RNA was isolated from the G and Y leaves using CTAB extraction method. RNA  
282 concentration and quality were checked using the Agilent 2100 Bioanalyzer (Agilent Technologies,  
283 Santa Clara, USA). RNA purity was measured with a Nano Drop 2000 (Thermo Scientific, USA).

284 4.4. *Library preparation for transcriptome sequencing*

285 Two RNA samples were treated with DNaseI to remove any remaining DNA, and then the  
286 oligo (dT) magnetic beads were used to collect poly A mRNA fraction. After mixing with  
287 fragmentation buffer, the resulting mRNA was broken into short RNA inserts of approximately 200  
288 nt. The fragments were used to synthesize the first cDNA strand via random hexamer priming, and  
289 the second-strand cDNA was then synthesized using DNA polymerase I and RNase H. The cDNA  
290 fragments was purified using magnetic beads and subjected to end-repair before adding a terminal  
291 A at the 3ends. Finally, sequencing adaptors were ligated to the short fragments, which were  
292 purified and amplified via polymerase chain reaction (PCR). The two libraries were generated and  
293 then sequenced on an Illumina HiSeq<sup>TM</sup> 4000 platform by Chengdu Life Baseline Technology Co.,  
294 Ltd. (Chengdu, China).

295 4.5. *Quality control and reads mapping*

296 The raw reads were edited to remove adapter sequences, low-quality reads, and reads with >10%  
297 of Q < 20 bases, and then mapped using HISAT v2.0.0 software ([http://ccb.jhu.edu/  
298 software/hisat2/downloads/](http://ccb.jhu.edu/software/hisat2/downloads/)) to the *Populus trichocarpa* Torr. & Gray genome.

299 4.6. *Quantification of gene expression level and differential expression analysis*

300 For gene expression analysis, gene abundance was estimated by RSEM v1.2.30 (<http://deweylab.github.io/RSEM/>)  
301 and then normalized with fragments per kilobase of exon per million  
302 mapped reads (FPKM) values [59]. To identify genes that were differently expressed between G and  
303 Y, the NOIseq v2.16.0 ([http://www.bioconductor.org/packages/  
release/bioc/html/NOISeq.html](http://www.bioconductor.org/packages/release/bioc/html/NOISeq.html))

304 was used in this experiment. Genes with probability  $>0.8$  and  $|\log_2 \text{fold change}| \geq 1$  were considered  
305 as DEGs between samples.

306 For functional annotation, GO enrichment analysis of DEGs was performed in the GO database  
307 (<http://www.geneontology.org/>) to calculate gene numbers for every term. The hypergeometric test  
308 was conducted to find significantly enriched GO terms in the input list of DEGs. KEGG enrichment  
309 analysis was implemented using the database resource (<http://www.genome.jp/kegg/>). The  
310 calculation method of KEGG analysis is the same as the GO analysis.

#### 311 4.7. Real-time RT-PCR

312 For qPCR analysis, total RNA was extracted using RNAPrep Pure Plant Kit (Tiangen Biotech Co.  
313 Ltd., Beijing, China), approximately 1  $\mu\text{g}$  RNA was reverse transcribed via a TransScript®  
314 All-in-One First-Strand cDNA Synthesis SuperMix for qPCR (Tiangen Biotech Co. Ltd., Beijing,  
315 China) according to the manufacturer's instructions. Eight genes were selected for validation using  
316 qRT-PCR. Primer sequences were designed using Primer Premier 5.0 software as shown in Table S3.  
317 qPCR DNA amplification and analysis were performed using the *TransScript*® Top Green qPCR  
318 SuperMix kit (Tiangen Biotech Co. Ltd., Beijing, China) in accordance with the manufacturer's  
319 protocol with an CFX Connect™ Real-Time System (Bio-Rad, Hercules, CA, USA). The thermal  
320 profile was as follows: pre-denaturation at 94 °C for 30 s; 94 °C for 5 s, 60 °C for 30 s, for 40 cycles.  
321 The relative expression level of selected genes in G and Y was normalized to CDC2 and ACT  
322 expression. Three biological replicates for each of the reactions were performed. The relative  
323 expression levels of target genes were estimated using the  $2^{-\Delta\Delta C_t}$  method [60].

#### 324 4.8. Data availability

325 All the clean reads is available at the National Center for Biotechnology Information (NCBI)  
326 Short Read Archive (SRA) Sequence Database (accession number SRA740964). Supplemental files  
327 available at FigShare. Table S1 contains significantly enriched gene ontologies among  
328 downregulated or upregulated genes in Y type compared to G type. Table S2 contains pathway  
329 enrichment. Table S3 contains primers for qPCR analysis.

### 330 5. Conclusions

331 In this study, physiological characterization and transcriptome sequence analysis showed that  
332 there were distinct differences in coloration between green leaves and yellow mutant leaves of  
333 *Populus deltoides* Marsh. Transcriptional sequence analysis identified 5 DEGs that participated in  
334 porphyrin and Chl metabolism and flavonoid biosynthesis pathways. Furthermore, RT-qPCR  
335 verified that those DEGs were expressed differentially in mutant and wild type plants.  
336 Down-regulation of *CHLP* and up-regulation of *CLH* might cause the difference of leaves. These  
337 results provide an excellent platform for future studies seeking for the molecular mechanisms  
338 underlying the yellowing phenotype in *Populus deltoides* Marsh and other closely related species.

339 **Author Contributions:** F.Z. and S.Z. participated in the conceive and design the experiments; F.Z. supervised  
340 the experiments; S.Z. performed the most experimental work and image analyses; X.W, J.C. and Q.L. analyzed  
341 the transcriptomic data; X.W., Y. Z. and T. L. prepared the figures and tables; S.Z. wrote the paper. All authors  
342 read and approved the final manuscript.

343 **Funding:** This research was funded by the National Natural Science Fund of China (No. 31870645) and by the  
344 12th Five Year Key Programs for forest breeding in Sichuan Province (No. 2016YZGG).

345 **Conflicts of Interest:** The authors declare no conflict of interest.

### 346 Abbreviations

Chl Chlorophyll

|              |                                                         |
|--------------|---------------------------------------------------------|
| DEGs         | Differentially expressed genes                          |
| CHLP         | Geranylgeranyl diphosphate                              |
| RT-qPCR      | Quantitative real-time PCR                              |
| CHLD         | Magnesium chelatase subunit D                           |
| CHLI         | Magnesium chelatase subunit I                           |
| PORB         | Protochlorophyllide oxidoreductase B                    |
| PPH          | Pheophytinase                                           |
| Chlase       | Chlorophyllase                                          |
| Urogen III   | Uroporphyrinogen III                                    |
| Coprogen III | Coproporphyrinogen III                                  |
| Proto IX     | Protoporphyrin IX                                       |
| Mg-Proto IX  | Magnesium protoporphyrin IX                             |
| Pchlde       | Protochlorophyllide                                     |
| Chlide       | Chlorophyllide                                          |
| G            | Green leaves                                            |
| Y            | Yellow leaves                                           |
| Caro         | Carotenoid                                              |
| CHLG         | Chlorophyll synthase                                    |
| PCR          | polymerase chain reaction                               |
| NCBI         | National Center for Biotechnology Information           |
| SRA          | Short Read Archive                                      |
| FPKM         | Fragments per kilobase of exon per million mapped reads |

## 347 **References**

- 348 1. Li, Z.; Wang, J.; Zhang, X.; Xu, L. Comparative transcriptome analysis of anthurium “albama” and its  
349 anthocyanin-loss mutant. *Plos One* **2015**, *10*, e0119027.
- 350 2. Li, W.; Yang, S.; Lu, Z.; He, Z.; Ye, Y.; Zhao, B.; Wang, L.; Jin, B. Cytological, physiological, and  
351 transcriptomic analyses of golden leaf coloration in *Ginkgo biloba* L. *Hortic. Res.* **2018**, *5*.
- 352 3. Tanaka, Y., Sasaki, N., Ohmiya, A. Biosynthesis of plant pigments: anthocyanins, betalains and  
353 carotenoids. *Plant Journal* **2008**, *54*, 733-749.
- 354 4. Tanaka, Y.; Brugliera, F.; Kalc, G.; Senior, M.; Dyson, B.; Nakamura, N.; Katsumoto, Y.; Chandler, S. Flower  
355 color modification by engineering of the flavonoid biosynthetic pathway: practical perspectives. *Biosci.*  
356 *Biotechnol. Biochem.* **2010**, *74*, 1760-1769.



- 357 5. Nagata, N.; Tanaka, R.; Satoh, S.; Tanaka, A. Identification of a vinyl reductase gene for chlorophyll  
358 synthesis in *Arabidopsis thaliana* and implications for the evolution of Prochlorococcus species. *Plant Cell*  
359 **2005**, *17*, 233-240.
- 360 6. Li, W.; Tang, S.; Zhang, S.; Shan, J.; Tang, C.; Chen, Q.; Jia, G.; Han, Y.; Zhi, H.; Diao, X. Gene mapping and  
361 functional analysis of the novel leaf color gene SiYGL1 in foxtail millet [*Setaria italica* (L.) P. Beauv]. *Physiol.*  
362 *Plant* **2015**, *157*, 24-37.
- 363 7. Wu, Z.; Zhang, X.; He, B.; Diao, L.; Sheng, S.; Wang, J.; Guo, X.; Su, N.; Wang, L.; Jiang, L.; et al. A  
364 chlorophyll-deficient rice mutant with impaired chlorophyllide esterification in chlorophyll biosynthesis.  
365 *Plant Physiol.* **2007**, *145*, 29-40.
- 366 8. Zhu, X.; Shuang, G.; Zhongwei, W.; Qing, D.; Yadi, X.; Tianquan, Z.; Wenqiang, S.; Xianchun, S.; Yinghua,  
367 L.; Guanghua, H. Map-based cloning and functional analysis of YGL8, which controls leaf colour in rice  
368 (*Oryza sativa* L.). *BMC Plant Biol.* **2016**, *16*, 134.
- 369 9. Luo, T.; Luo, S.; Araujo, W.L.; Schlicke, H.; Rothbart, M.; Yu, J.; Fan, T.; Fernie, A.R.; Grimm, B.; Luo, M.  
370 Virus-induced gene silencing of pea CHLI and CHLD affects tetrapyrrole biosynthesis, chloroplast  
371 development and the primary metabolic network. *Plant Physiol. Biochem.* **2013**, *65*, 17-26.
- 372 10. Yang, Y.L.; Xu, J.; Rao, Y.C.; Zeng, Y.J.; Liu, H.J.; Zheng, T.T.; Zhang, G.-H.; Hu, J.; Guo, L.B.; Qian, Q.; et al.  
373 Cloning and functional analysis of pale-green leaf (PGL<sub>10</sub>) in rice (*Oryza sativa* L.). *Plant Growth Regul.* **2016**,  
374 *78*, 69-77.
- 375 11. Hörtensteiner, S. Update on the biochemistry of chlorophyll breakdown. *Plant Mol. Biol.* **2013**, *82*, 505-17.
- 376 12. Schelbert, S; Aubry, S; Burla, B; Agne, B; Kessler, F; Krupinska K, Hörtensteiner, S. Pheophytin  
377 pheophorbide hydrolase (pheophytinase) is involved in chlorophyll breakdown during leaf senescence in  
378 *Arabidopsis*. *Plant Cell* **2009**, *21*, 767-85.
- 379 13. Kariola, T.; Brader, G.; Li, J.; Palva, E.T. Chlorophyllase 1, a damage control enzyme, affects the balance  
380 between defense pathways in plants. *Plant Cell* **2005**, *17*, 282-294.
- 381 14. Jacob-Wilk, D.; Goldschmidt, D.H.E.E.; Riov, J.; Eyal, Y. Chlorophyll breakdown by chlorophyllase:  
382 Isolation and functional expression of the Chlase1 gene from ethylene-treated Citrus fruit and its regulation  
383 during development. *Plant J.* **1999**, *20*, 653-661.
- 384 15. Azoulay Shemer, T.; Harpaz-Saad, S.; Belausov, E.; Lovat, N.; Krokhin, O.; Spicer, V.; Standing, K.G.;  
385 Goldschmidt, E.E.; Eyal, Y. Citrus chlorophyllase dynamics at ethylene-induced fruit color-break: A study  
386 of chlorophyllase expression, posttranslational processing kinetics, and in situ intracellular localization.  
387 *Plant Physiol.* **2008**, *148*, 108-118.
- 388 16. Jung, K.-H.; Hur, J.; Ryu, C.-H.; Choi, Y.; Chung, Y.-Y.; Miyao, A.; Hirochika, H.; An, G. Characterization of  
389 a Rice Chlorophyll-Deficient Mutant Using the T-DNA Gene-Trap System. *Plant Cell Physiol.* **2003**, *44*,  
390 463-472.
- 391 17. Wang, P.; Gao, J.; Wan, C.; Zhang, F.; Xu, Z.; Huang, X.; Sun, X.; Deng, X. Divinyl chlorophyll(ide) a can be  
392 converted to monovinyl chlorophyll(ide) a by a divinyl reductase in rice. *Plant Physiol.* **2010**, *153*, 994-1003.
- 393 18. Liu, W.; Fu, Y.; Hu, G.; Si, H.; Zhu, L.; Wu, C.; Sun, Z. Identification and fine mapping of a thermo-sensitive  
394 chlorophyll deficient mutant in rice (*oryza sativa* L.). *Planta* **2007**, *226*, 785- 795.
- 395 19. Sakuraba, Y.; Rahman, M.L.; Cho, S.H.; Kim, Y.S.; Koh, H.J.; Yoo, S.C.; Paek N.C. The rice faded green leaf  
396 locus encodes protochlorophyllide oxidoreductase and is essential for chlorophyll synthesis under high  
397 light conditions. *Plant J.* **2013**, *74*, 122-133.
- 398 20. Sakuraba, Y.; Park, S.Y.; Kim, Y.S.; Wang, S.H.; Yoo, S.C.; Hrttensteiner, S.; Paek, N.C. *Arabidopsis*

- 399 stay-green2 is a negative regulator of chlorophyll degradation during leaf senescence. *Mol. Plant.* **2014**, 7,  
400 1288-1302.
- 401 21. Zhang, K.; Liu, Z.; Shan, X.; Li, C.; Tang, X.; Chi, M.; Feng, H. Physiological properties and chlorophyll  
402 biosynthesis in a pak-choi (*Brassica rapa* L. ssp. *chinensis*) yellow leaf mutant, *pylm. Acta Physiol. Plant.*  
403 **2017**, 39, 22.
- 404 22. Akifumi, A.; Shozo, K.; Nami, G.Y.; Mikio, S.; Nobuhito, M.; Hiroshi, Y.; Yoshiko, K. Color recovery in  
405 berries of grape (*vitis vinifera* L.) 'benitaka', a bud sport of 'italia', is caused by a novel allele at the  
406 *VvmybA1* locus. *Plant Sci.* **2009**, 176, 470-478.
- 407 23. Wasscher, J. The importance of sports in some florist's flowers. *Euphytica* **1956**, 5, 163-170.
- 408 24. Li, C.F.; Xu, Y.X.; Ma, J.Q.; Jin, J.Q.; Huang, D.J.; Yao, M.Z.; Ma, C.L.; Chen, L. Biochemical and  
409 transcriptomic analyses reveal different metabolite biosynthesis profiles among three color and  
410 developmental stages in 'Anji Baicha' (*camellia sinensis*). *BMC Plant Bio.* **2016**, 16, 195.
- 411 25. Gao, M.; Hu, L.; Li, Y.; Weng, Y. The chlorophyll-deficient golden leaf mutation in cucumber is due to a  
412 single nucleotide substitution in *CsChlI* for magnesium chelatase I subunit. *Theor. Appl. Genet.* **2016**, 129,  
413 1-13.
- 414 26. Chen, H.; Cheng, Z.; Ma, X.; Wu, H.; Liu, Y.; Zhou, K.; Chen, Y.; Ma, W.; Bi, J.; Zhang, X.; et al. A knockdown  
415 mutation of *YELLOW-GREEN LEAF2* blocks chlorophyll biosynthesis in rice. *Plant Cell Rep.* **2013**, 32,  
416 1855-1867.
- 417 27. Zhang, S.; Zhi, H.; Li, W.; Shan, J.; Tang, C.; Jia, G.; Tang, S.; Diao, X. SiYGL2 is involved in the regulation of  
418 leaf senescence and photosystem II efficiency in *Setaria italica* (L.) P. Beauv. *Front. Plant Sci.* **2018**, 9, 1308.
- 419 28. Zhang, L.; Liu, C.; An, X.; Wu, H.; Feng, Y.; Wang, H.; Sun, D. Identification and genetic mapping of a  
420 novel incompletely dominant yellow leaf color gene, *Y1718*, on chromosome 2bs in wheat. *Euphytica* **2017**,  
421 213, 141.
- 422 29. Ruan, B.; Gao, Z.; Zhao, J.; Zhang, B.; Zhang, A.; Hong, K.; Yang, S.; Jiang, H.; Liu, C.; Chen, G.; et al. The  
423 rice *YCL* gene encoding an Mg<sup>2+</sup>-chelatase ChlD subunit is affected by temperature for chlorophyll  
424 biosynthesis. *J. Plant Biol.* **2017**, 60, 314-321.
- 425 30. Yoshinobu, K.; Yasusi, Y.; Yasuko, S.; Ayumu, T.; Shunichi, T.; Hideo, Y. High-susceptibility of  
426 photosynthesis to photoinhibition in the tropical plant *Ficus microcarpa* L. f. cv. golden leaves. *BMC Plant*  
427 *Biol.* **2002**, 2, 2.
- 428 31. Wang, L.; Yue, C.; Cao, H.; Zhou, Y.; Zeng, J.; Yang, Y.; Wang, X. Biochemical and transcriptome analyses  
429 of a novel chlorophyll-deficient chlorina tea plant cultivar. *BMC Plant Physiol.* **2014**, 14, 352.
- 430 32. Tanaka, A.; Tanaka, R. Chlorophyll metabolism. *Curr. Opin. Plant Biol.* **2006**, 9, 248-255.
- 431 33. Eckhardt, U.; Grimm, B.; Hortensteiner, S. Recent advances in chlorophyll biosynthesis and breakdown in  
432 higher plants. *Plant Mol Biol.* **2004**, 56, 1-14.
- 433 34. Tanaka, A.; Ito, H.; Tanaka, R.; Tanaka, N.K.; Yoshida, K.; Okada, K. Chlorophyll a oxygenase (cao) is  
434 involved in chlorophyll b formation from chlorophyll a. *Proc. Natl. Acad. Sci.* **1998**, 95, 12719-12723.
- 435 35. Masuda, T.; Fujita, Y. Regulation and evolution of chlorophyll metabolism. *Photochem Photobiol Sci.* **2008**, 7,  
436 1131-1149.
- 437 36. von Wettstein, D.; Gough, S.; Kannangara, C.G. Chlorophyll biosynthesis. *Plant Cell* **1995**, 7, 1039-1057.
- 438 37. Addlesee, H.A.; Gibson, L.C.; Jensen, P.E.; Hunter, C.N. Cloning, sequencing and functional assignment of  
439 the chlorophyll biosynthesis gene, *chl<sub>p</sub>*, of *Synechocystis* sp. pcc 6803. *FEBS Lett.* **1996**, 389, 126-130.



- 440 38. Addlesee, H.A.; Hunter, C.N. Physical mapping and functional assignment of the  
441 geranylgeranyl-bacteriochlorophyll reductase gene, *bchp*, of *rhodobacter sphaeroides*. *J. Bacteriol.*  
442 **1999**, *181*, 7248.
- 443 39. Tanaka, R.; Oster, U.; Kruse, E.; Rudiger, W.; Grimm, B. Reduced activity of geranylgeranyl reductase leads  
444 to loss of chlorophyll and tocopherol and to partially geranylgeranylated chlorophyll in transgenic tobacco  
445 plants expressing antisense *rma* for geranylgeranyl reductase. *Plant Physiol.* **1999**, *120*, 695-704.
- 446 40. Shpilyov, A.V.; Zinchenko, V.V.; Shestakov, S.V.; Grimm, B.; Lokstein, H. Inactivation of the  
447 geranylgeranyl reductase (*chlP*) gene in the cyanobacterium *Synechocystis* sp. pcc 6803. *BBA - Bioenergetics*  
448 **2005**, *1706*, 195-203.
- 449 41. Harpazsaad, S.; Azoulay, T.; Arazi, T.; Benyaakov, E.; Mett, A.; Shibolet, Y.M.; Hortensteiner, S.; Gidoni,  
450 D.; Galon, A.; Goldschmidt, E.E.; et al. Chlorophyllase is a rate-limiting enzyme in chlorophyll catabolism  
451 and is posttranslationally regulated. *Plant Cell* **2007**, *19*, 1007-1022.
- 452 42. Tsuchiya, T.; Ohta, H.; Okawa, K.; Iwamatsu, A.; Shimada, H.; Masuda, T.; Takamiya, K. Cloning of  
453 chlorophyllase, the key enzyme in chlorophyll degradation: finding of a lipase motif and the induction by  
454 methyl jasmonate. *Proc. Natl. Acad. Sci. USA* **1999**, *96*, 15362-15367.
- 455 43. Benedetti, C.E.; Arruda, P. Altering the expression of the chlorophyllase gene *ATHCOR1* in transgenic  
456 *Arabidopsis* caused changes in the chlorophyll-to-chlorophyllide ratio. *Plant Physiol.* **2002**, *128*, 1255-1263.
- 457 44. Schenk, N.; Schelbert, S.; Kanwischer, M.; Goldschmidt, E.E.; Dormann, P.; Hortensteiner, S. The  
458 chlorophyllases *ATCLH1* and *ATCLH2* are not essential for senescence-related chlorophyll breakdown in  
459 *Arabidopsis thaliana*. *FEBS Lett.* **2007**, *581*, 5517-5525.
- 460 45. Wu, H.; Shi, N.; An, X.; Liu, C.; Fu, H.; Cao, L.; Feng, Y.; Sun, D.; Zhang, L. Candidate genes for yellow leaf  
461 color in common wheat (*Triticum aestivum* L.) and major related metabolic pathways according to  
462 transcriptome profiling. *Int. J. Mol. Sci.* **2018**, *19*, 1594.
- 463 46. Sobel, J.M.; Streisfeld, M.A. Flower color as a model system for studies of plant evo-devo. *Front. Plant Sci.*  
464 **2013**, *4*, 321.
- 465 47. Schmelzer, E.; Jahnen, W.; Hahlbrock, K. In situ localization of light-induced chalcone synthase mRNA,  
466 chalcone synthase, and flavonoid end products in epidermal cells of parsley leaves. *Proc. Natl. Acad. Sci.*  
467 *USA*. **1988**, *85*, 2989-2993.
- 468 48. Hernández, I.; Alegre, Leonor; Breusegem, V.; Frank. How relevant are flavonoids as antioxidants in  
469 plants? *Trends Plant Sci.* **2009**, *14*, 125-132.
- 470 49. Yamasaki, H.; Heshiki, R. N. Leaf-goldenring induced by high light in *Ficus microcarpa* L.f., a tropical fig. *J.*  
471 *Plant Res.* **1995**, *108*, 171-180.
- 472 50. D'Auria, J.C. Acyltransferases in plants: a good time to be BAHD. *Curr. Opin. Plant Biol.* **2006**, *9*, 331-340.
- 473 51. Li, X.; Bonawitz, N.D.; Weng, J.K.; Chapple, C. The growth reduction associated with repressed lignin  
474 biosynthesis in *Arabidopsis thaliana* is independent of flavonoids. *Plant Cell* **2010**, *22*, 1620-1632.
- 475 52. Hoffmann, L.; Besseau, S.; Geoffroy, P.; Ritzenthaler, C.; Meyer, D.; Lapierre, C.; Pollet B.; Legrand, M.  
476 Silencing of hydroxycinnamoyl-coenzyme A shikimate/quinate hydroxycinnamoyltransferase affects  
477 phenylpropanoid biosynthesis. *Plant Cell* **2004**, *16*, 1446-1465.
- 478 53. Pu, Y.; Chen, F.; Ziebell, A.; Davison, B.H.; Ragauskas, A.J. NMR characterization of C3H and HCT  
479 down-regulated alfalfa lignin. *BioEnergy Res.* **2009**, *2*, 198.

- 480 54. Peng, X.; Sun, S.; Wen, J.; Yin, W.; Sun, R. Structural characterization of lignins from hydroxycinnamoyl  
481 transferase (HCT) down-regulated transgenic poplars. *Fuel* **2014**, *134*, 485-492.
- 482 55. Cui, K.; Wang, H.; Liao, S.; Tang, Q.; Li, L.; Cui, Y.; He Y. Transcriptome sequencing and analysis for culm  
483 elongation of the world's largest bamboo (*dendrocalamus sinicus*). *Plos One* **2016**, *11*, e0157362.
- 484 56. Wu, Y.F.; Zhao, Y.; Liu, X.Y.; Gao, S.; Cheng, A.X.; Lou, H.X. Isolation and functional characterization of  
485 hydroxycinnamoyltransferases from the liverworts *plagiochasma appendiculatum*, and *marchantia*  
486 *paleacea*. *Plant Physiol. Biochem.* **2018**, *129*, 400-410.
- 487 57. Lichtenthaler, H.K. Chlorophylls and carotenoids: Pigments of photosynthetic biomembranes. *Methods*  
488 *Enzymol.* **1987**, *148*, 350-382.
- 489 58. Bogorad, L. Porphyrin synthesis. In *Methods in Enzymology*; Colowick, S.P., Kaplan, N.O., Eds.; Academic  
490 Press: New York, NY, USA, 1962; Volume 5, pp. 885-895, ISBN 0076-6879.
- 491 59. Mortazavi, A.; Williams, B.A.; McCue, K.; Schaeffer, L.; Wold, B. Mapping and quantifying mammalian  
492 transcriptomes by RNA-Seq. *Nat Methods* **2008**, *5*, 621-628.
- 493 60. Schmittgen, T.D.; Livak, K.J. Analyzing real-time PCR data by the comparative C<sup>T</sup> method. *Nat. Protoc.*  
494 **2008**, *3*, 1101-1108.
- 495
